# Supplementary material for: Impairment of cortical GABAergic synaptic transmission in an environmental rat model of autism
Source: Oxford University Press journal article supplement (doi:10.1017/s1461145712001216), 2012-12-11
Supplement: s1461145712001216sup001.doc [file s1461145712001216sup001.doc]

**Supplemental Material**

**Preparation**

We used a temporal cortex slice preparation similar to the one previously described . Animals were anesthetized with isoflurane (Baxter) and sacrificed according to the National Institutes of Health Guidelines (UTD IACUC number 04-04) and their brains sliced with a vibrotome (VT1000, Leica) in a cold solution (0-4⁰C) containing (mM) 126 NaCl, 3.5 KCl, 10 glucose, 25 NaHCO3, 1.25 NaH2PO4, 1.5 CaCl2, 1.5 MgCl2 and 0.2 ascorbic acid, at pH 7.4 and saturated with a mixture of 95% O2 and 5% CO2 (ACSF). Coronal slices (270 µm thick) from the most caudal fourth of the brain were retained after removing the occipital convexity (caudal end of the brain after removal of the cerebellum) and subsequently incubated in ACSF at 32oC before being placed in the recording chamber. The recording area was selected dorsally to the rhinal fissure corresponding to the auditory cortex . The recording solution used to detect the mIPSCs contained tetrodotoxin (0.5 µM). The recording solution also contained 6,7-dinitroquinoxaline-2,3-dione (DNQX, 10 µM) and kynurenate (2 mM) for blocking a-amino-3- hydroxy-5-methyl-4-isoxazolepropionic acid receptor and N-methyl-D aspartate receptor-mediated currents, respectively.

Atzori M, Lei S, Evans DI, Kanold PO, Phillips-Tansey E, McIntyre O, McBain CJ (2001) Differential synaptic processing separates stationary from transient inputs to the auditory cortex. NatNeurosci 4:1230-1237.

Rutkowski RG, Miasnikov AA, Weinberger NM (2003) Characterisation of multiple physiological fields within the anatomical core of rat auditory cortex. HearRes 181:116-130.
